# Supplementary material for: High Granulocyte-Macrophage Colony Stimulating Factor to Interleukin 10 Ratio and Marked Antioxidant Enzyme Activities Predominate in Symptomatic Cattle Naturally Infected with Candidatus Mycoplasma haemobos, Theileria orientalis, Theileria sinensis and Trypanosoma evansi
Source: Animals (Basel). 2021 Jul 29;11(8):2235. doi: 10.3390/ani11082235 (PMC8388426; doi:10.3390/ani11082235)
Supplement: Supplementary file 1 [file animals-11-02235-s001.zip › animals-1171777-supplementary.pdf]

**Table S1.** Correlation between clinical symptoms, age and sex, and cytokines in cattle naturally infected with *Candidatus Mycoplasma haemobos*.

| Proinflammatory/<br>Anti-inflammatory<br>Cytokines | Age         |                | Sex         |                | Clinical Symptoms |                |
|----------------------------------------------------|-------------|----------------|-------------|----------------|-------------------|----------------|
|                                                    | Correlation | <i>p</i> Value | Correlation | <i>p</i> Value | Correlation       | <i>p</i> Value |
| Interleukin 12 (ng/L)                              | −0.231      | 0.127          | −0.007      | 0.874          | <b>−0.685</b>     | <b>0.001</b>   |
| Interleukin 10 (ng/L)                              | −0.652      | 0.543          | −0.310      | 0.632          | <b>−0.618</b>     | <b>0.003</b>   |
| GM-CSF (pg/mL)                                     | 0.006       | 0.964          | 0.010       | 0.936          | <b>−0.315</b>     | <b>0.006</b>   |
| Interleukin 4 (ng/L)                               | −0.143      | 0.247          | 0.089       | 0.476          | <b>0.409</b>      | <b>0.000</b>   |
| Interferon- $\gamma$ (pg/mL)                       | 0.163       | 0.187          | 0.054       | 0.663          | −0.088            | 0.451          |

Numbers with boldface indicates association ( $p < 0.05$ ) between factors (age, sex and clinical symptoms) and cytokine level in the blood parasite infected cattle.

**Table S2.** Correlation between clinical symptoms, sex, and cytokines in cattle naturally infected with *Theileria orientalis*.

| Proinflammatory/<br>Anti-inflammatory<br>Cytokines | Sex         |                | Clinical Symptoms |                |
|----------------------------------------------------|-------------|----------------|-------------------|----------------|
|                                                    | Correlation | <i>p</i> value | Correlation       | <i>p</i> Value |
| Interleukin 12 (ng/L)                              | −0.006      | 0.963          | <b>−0.323</b>     | <b>0.007</b>   |
| Interleukin 10 (ng/L)                              | −0.294      | 0.022          | <b>−0.374</b>     | <b>0.002</b>   |
| GM-CSF (pg/mL)                                     | 0.163       | 0.209          | <b>−0.279</b>     | <b>0.020</b>   |
| Interleukin 4 (ng/L)                               | 0.072       | 0.581          | <b>−0.406</b>     | <b>0.001</b>   |
| Interferon- $\gamma$ (pg/mL)                       | 0.053       | 0.686          | <b>−0.337</b>     | <b>0.005</b>   |

Numbers with boldface indicates association ( $p < 0.05$ ) between factors (sex and clinical symptoms) and cytokine level in the blood parasite infected cattle.

**Table S3.** Correlation between clinical symptoms, sex, and cytokines levels in cattle naturally infected with *Anaplasma marginale*.

| Proinflammatory/<br>Anti-inflammatory<br>Cytokines | Sex         |                | Clinical symptoms |                |
|----------------------------------------------------|-------------|----------------|-------------------|----------------|
|                                                    | Correlation | <i>p</i> value | Correlation       | <i>p</i> Value |
| Interleukin 12 (ng/L)                              | −0.006      | 0.963          | <b>−0.323</b>     | <b>0.007</b>   |
| Interleukin 10 (ng/L)                              | −0.294      | 0.022          | <b>−0.374</b>     | <b>0.002</b>   |
| GM-CSF (pg/mL)                                     | 0.163       | 0.209          | <b>−0.279</b>     | <b>0.020</b>   |
| Interleukin 4 (ng/L)                               | 0.072       | 0.581          | <b>−0.406</b>     | <b>0.001</b>   |
| Interferon- $\gamma$ (pg/mL)                       | 0.053       | 0.686          | <b>−0.337</b>     | <b>0.005</b>   |

Numbers with boldface indicates association ( $p < 0.05$ ) between factors (age and clinical symptoms) and cytokine level in the blood parasite infected cattle.

**Table S4.** Correlation between clinical symptoms, age, sex, and cytokine levels in cattle naturally infected with *Theileria sinensis*.

| Proinflammatory/<br>Anti-inflammatory<br>Cytokines | Age           |                | Sex         |                | Clinical Symptoms |                |
|----------------------------------------------------|---------------|----------------|-------------|----------------|-------------------|----------------|
|                                                    | Correlation   | <i>p</i> value | Correlation | <i>p</i> value | Correlation       | <i>p</i> value |
| Interleukin 12 (ng/L)                              | 0.129         | 0.491          | −0.075      | 0.686          | <b>−0.444</b>     | <b>0.005</b>   |
| Interleukin 10 (ng/L)                              | 0.271         | 0.141          | −0.156      | 0.403          | <b>−0.433</b>     | <b>0.006</b>   |
| GM-CSF (pg/mL)                                     | 0.082         | 0.661          | 0.177       | 0.342          | <b>−0.600</b>     | <b>0.000</b>   |
| Interleukin 4 (ng/L)                               | <b>−0.512</b> | <b>0.003</b>   | 0.033       | 0.862          | <b>−0.488</b>     | <b>0.002</b>   |
| Interferon- $\gamma$ (pg/mL)                       | 0.103         | 0.081          | 0.158       | 0.396          | <b>−0.441</b>     | <b>0.005</b>   |

Numbers with boldface indicates association ( $p < 0.05$ ) between factors (age and clinical symptoms) and cytokine level in the blood parasite infected cattle.

**Table S5.** Correlation between clinical symptoms and cytokine levels in cattle naturally infected with *Trypanosoma evansi*.

| Proinflammatory/<br>Anti-inflammatory<br>Cytokines | Clinical Symptoms |
|----------------------------------------------------|-------------------|
|                                                    | Correlation       |
|                                                    | <i>p</i> Value    |
| Interleukin 12 (ng/L)*                             | <b>−0.984</b>     |
| Interleukin 10 (ng/L)*                             | <b>−0.996</b>     |
| GM-CSF (pg/mL)*                                    | <b>−0.996</b>     |
| Interleukin 4 (ng/L)*                              | <b>0.997</b>      |
| Interferon- $\gamma$ (pg/mL)*                      | <b>−0.978</b>     |

\*Asterisk superscript on a parameter indicates significant difference at  $p < 0.05$ . Numbers with boldface indicates association ( $p < 0.05$ ) between clinical symptoms and cytokine level in the blood parasite infected cattle.

**Table S6.** Correlation between clinical symptoms, sex, and cytokine levels in cattle naturally infected with *Anaplasma platys*.

| Proinflammatory/<br>Anti-inflammatory<br>Cytokines | Sex         |                | Clinical Symptoms |                |
|----------------------------------------------------|-------------|----------------|-------------------|----------------|
|                                                    | Correlation | <i>p</i> value | Correlation       | <i>p</i> value |
| Interleukin 12 (ng/L)                              | 0.403       | 0.072          | <b>−0.785</b>     | <b>0.002</b>   |
| Interleukin 10 (ng/L)                              | 0.371       | 0.410          | <b>−0.670</b>     | <b>0.005</b>   |
| GM-CSF (pg/mL)                                     | −0.367      | 0.418          | <b>−0.941</b>     | <b>0.000</b>   |
| Interleukin 4 (ng/L)                               | 0.243       | 0.600          | <b>−0.929</b>     | <b>0.000</b>   |
| Interferon- $\gamma$ (pg/mL)                       | 0.501       | 0.252          | <b>−0.812</b>     | <b>0.396</b>   |

Numbers with boldface indicates association ( $p < 0.05$ ) between factors (sex and clinical symptoms) and cytokine level in the blood parasite infected cattle.

**Table S7.** Effect of farm ownership and age on oxidative and antioxidative stress responses in cattle naturally infected with *Candidatus Mycoplasma haemobos*.

| Parameters   | Private Farm   | Government Farm | <i>p</i> Value |
|--------------|----------------|-----------------|----------------|
| MDA (nM/ml)  | 2.58 ± 0.19    | 2.39 ± 0.08     | 0.344          |
| SOD (U/ml) * | 941.85 ± 15.51 | 876.49 ± 21.35  | 0.017          |
| GPx (U/ml)   | 178.12 ± 11.2  | 206.20 ± 13.56  | 0.118          |

  

|             | Young          | Adult          | <i>p</i> Value |
|-------------|----------------|----------------|----------------|
| MDA (nM/ml) | 2.29 ± 0.20    | 2.53 ± 0.10    | 0.541          |
| SOD (U/ml)  | 958.99 ± 13.32 | 936.03 ± 15.36 | 0.710          |
| GPx (U/ml)  | 191.81 ± 12.93 | 192.01 ± 7.73  | 0.995          |

\*Asterisk superscript on a parameter indicates significant difference,  $p < 0.05$ .

**Table S8.** Effect of farm ownership on oxidative and antioxidative stress responses in cattle naturally infected with *Theileria orientalis*.

| Parameters  | Private Farm   | Government Farm | <i>p</i> value |
|-------------|----------------|-----------------|----------------|
| MDA (nM/ml) | 2.89 ± 0.31    | 2.59 ± 0.14     | 0.313          |
| SOD (U/ml)  | 937.93 ± 21.44 | 937.71 ± 25.57  | 0.996          |
| GPx (U/ml)  | 200.08 ± 10.7  | 191.54 ± 8.11   | 0.546          |

Oxidative stress response was not computed for age because all *T. orientalis* infected cattle were adults.

**Table S9.** Effect of farm ownership on oxidative and antioxidative stress responses in cattle naturally infected with *A. marginale*.

| Parameters  | Private farm   | Government farm | <i>p</i> Value |
|-------------|----------------|-----------------|----------------|
| MDA (nM/ml) | 2.47 ± 0.28    | 2.40 ± 0.08     | 0.773          |
| SOD (U/ml)  | 989.61 ± 12.90 | 844.98 ± 16.28  | 0.003          |
| GPx (U/ml)  | 216.63 ± 19.63 | 194.90 ± 13.52  | 0.353          |

Oxidative stress response was not computed for age because all *A. marginale* infected cattle were adults.

**Table S10.** Effect of farm ownership and age on oxidative and antioxidative stress responses in cattle naturally infected with *Theileria sinensis*.

| Parameters  | Private Farm   | Government Farm | <i>p</i> Value |
|-------------|----------------|-----------------|----------------|
| MDA (nM/ml) | 3.49 ± 0.58    | 2.67 ± 0.95     | 0.090          |
| SOD (U/ml)  | 929.38 ± 20.91 | 877.85 ± 30.53  | 0.383          |
| GPx (U/ml)  | 216.90 ± 18.82 | 195.18 ± 12.76  | 0.407          |

  

| Age         | Young         | Adult          | <i>p</i> Value |
|-------------|---------------|----------------|----------------|
| MDA (nM/ml) | 2.38 ± 0.36   | 2.89 ± 0.22    | 0.549          |
| SOD (U/ml)  | 938.44 ± 6.85 | 886.11 ± 25.83 | 0.605          |
| GPx (U/ml)  | 248.62 ± 5.59 | 196.74 ± 11.22 | 0.242          |

**Table S11.** Effect of farm ownership on oxidative and antioxidative stress responses in cattle naturally infected with *A. platys*.

| Parameters   | Private Farm    | Government Farm | <i>p</i> value |
|--------------|-----------------|-----------------|----------------|
| MDA (nM/ml)  | 5.84 ± 0.15     | 4.59 ± 0.83     | 0.262          |
| SOD (U/ml) * | 1561.46 ± 15.74 | 1029.26 ± 13.14 | 0.033          |
| GPx (U/ml)   | 343.14 ± 14.09  | 271.51 ± 12.63  | 0.058          |

Oxidative stress response was not computed for age because all *A. platys* infected cattle were adults.
